# Supplementary material for: Deciphering the Wisent Demographic and Adaptive Histories from Individual Whole-Genome Sequences
Source: PubMed Central journal article supplement — Mol Biol Evol. 2016 Jul 19;33(11):2801–14. doi: 10.1093/molbev/msw144 (PMC5062319; doi:10.1093/molbev/msw144), 2016-07-19
Supplement: supp_msw144_Suppl_Figures.pdf [file supp_msw144_Suppl_Figures.pdf]

**A) BTA vs. BBO\_3569**

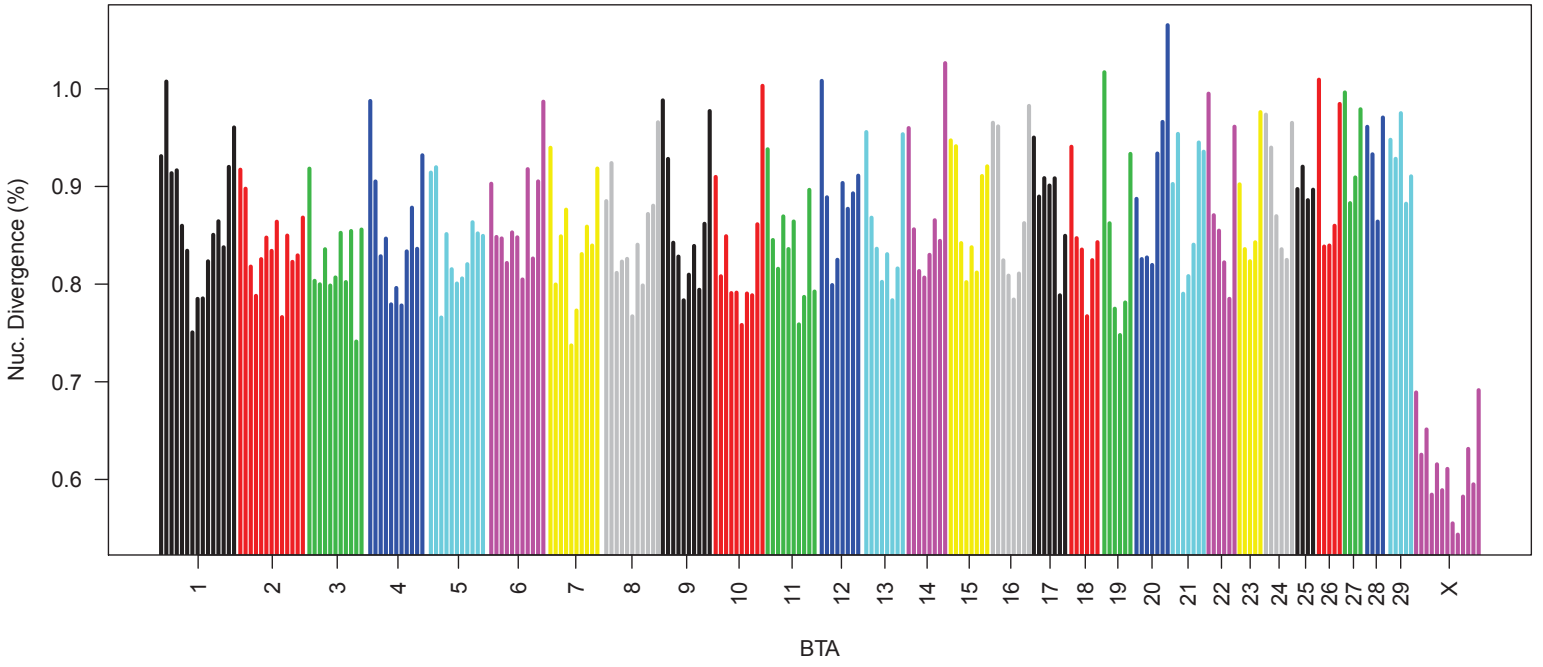

**B) BTA vs. BBO\_3574**

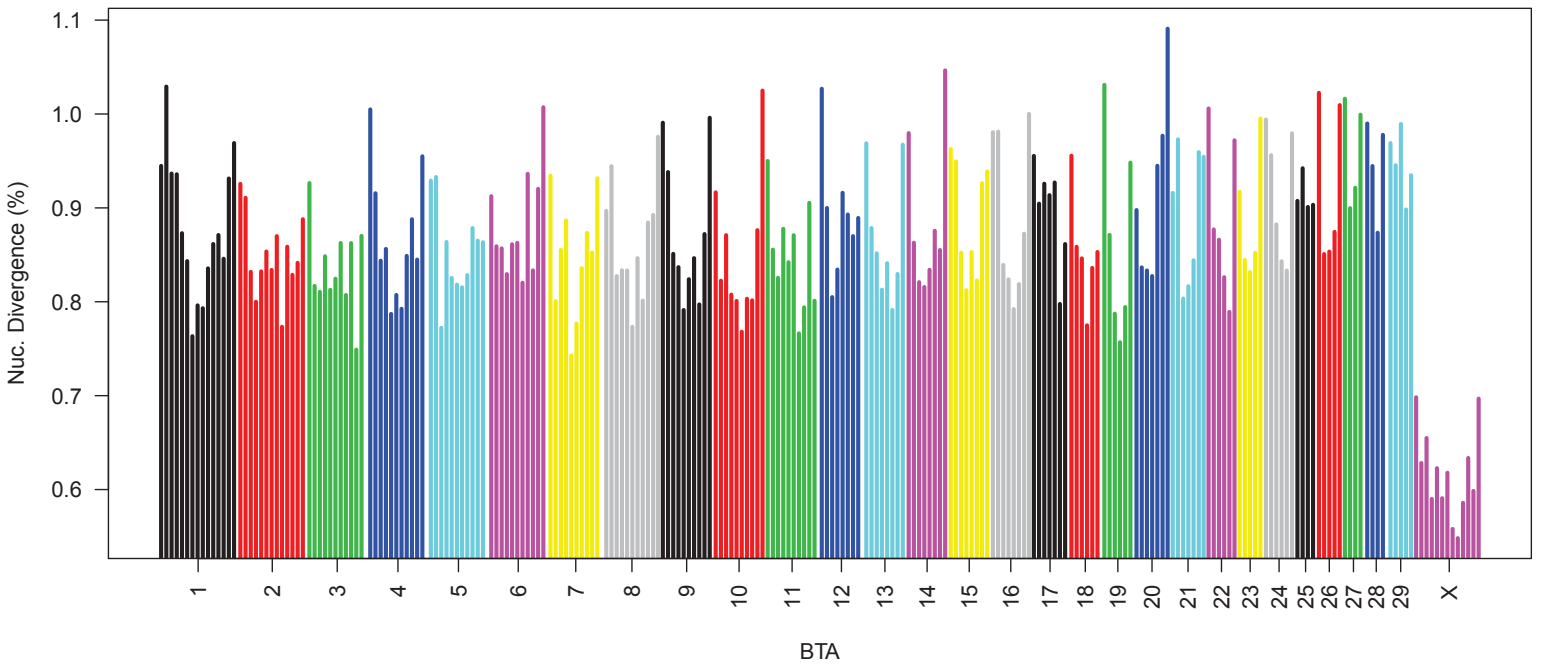

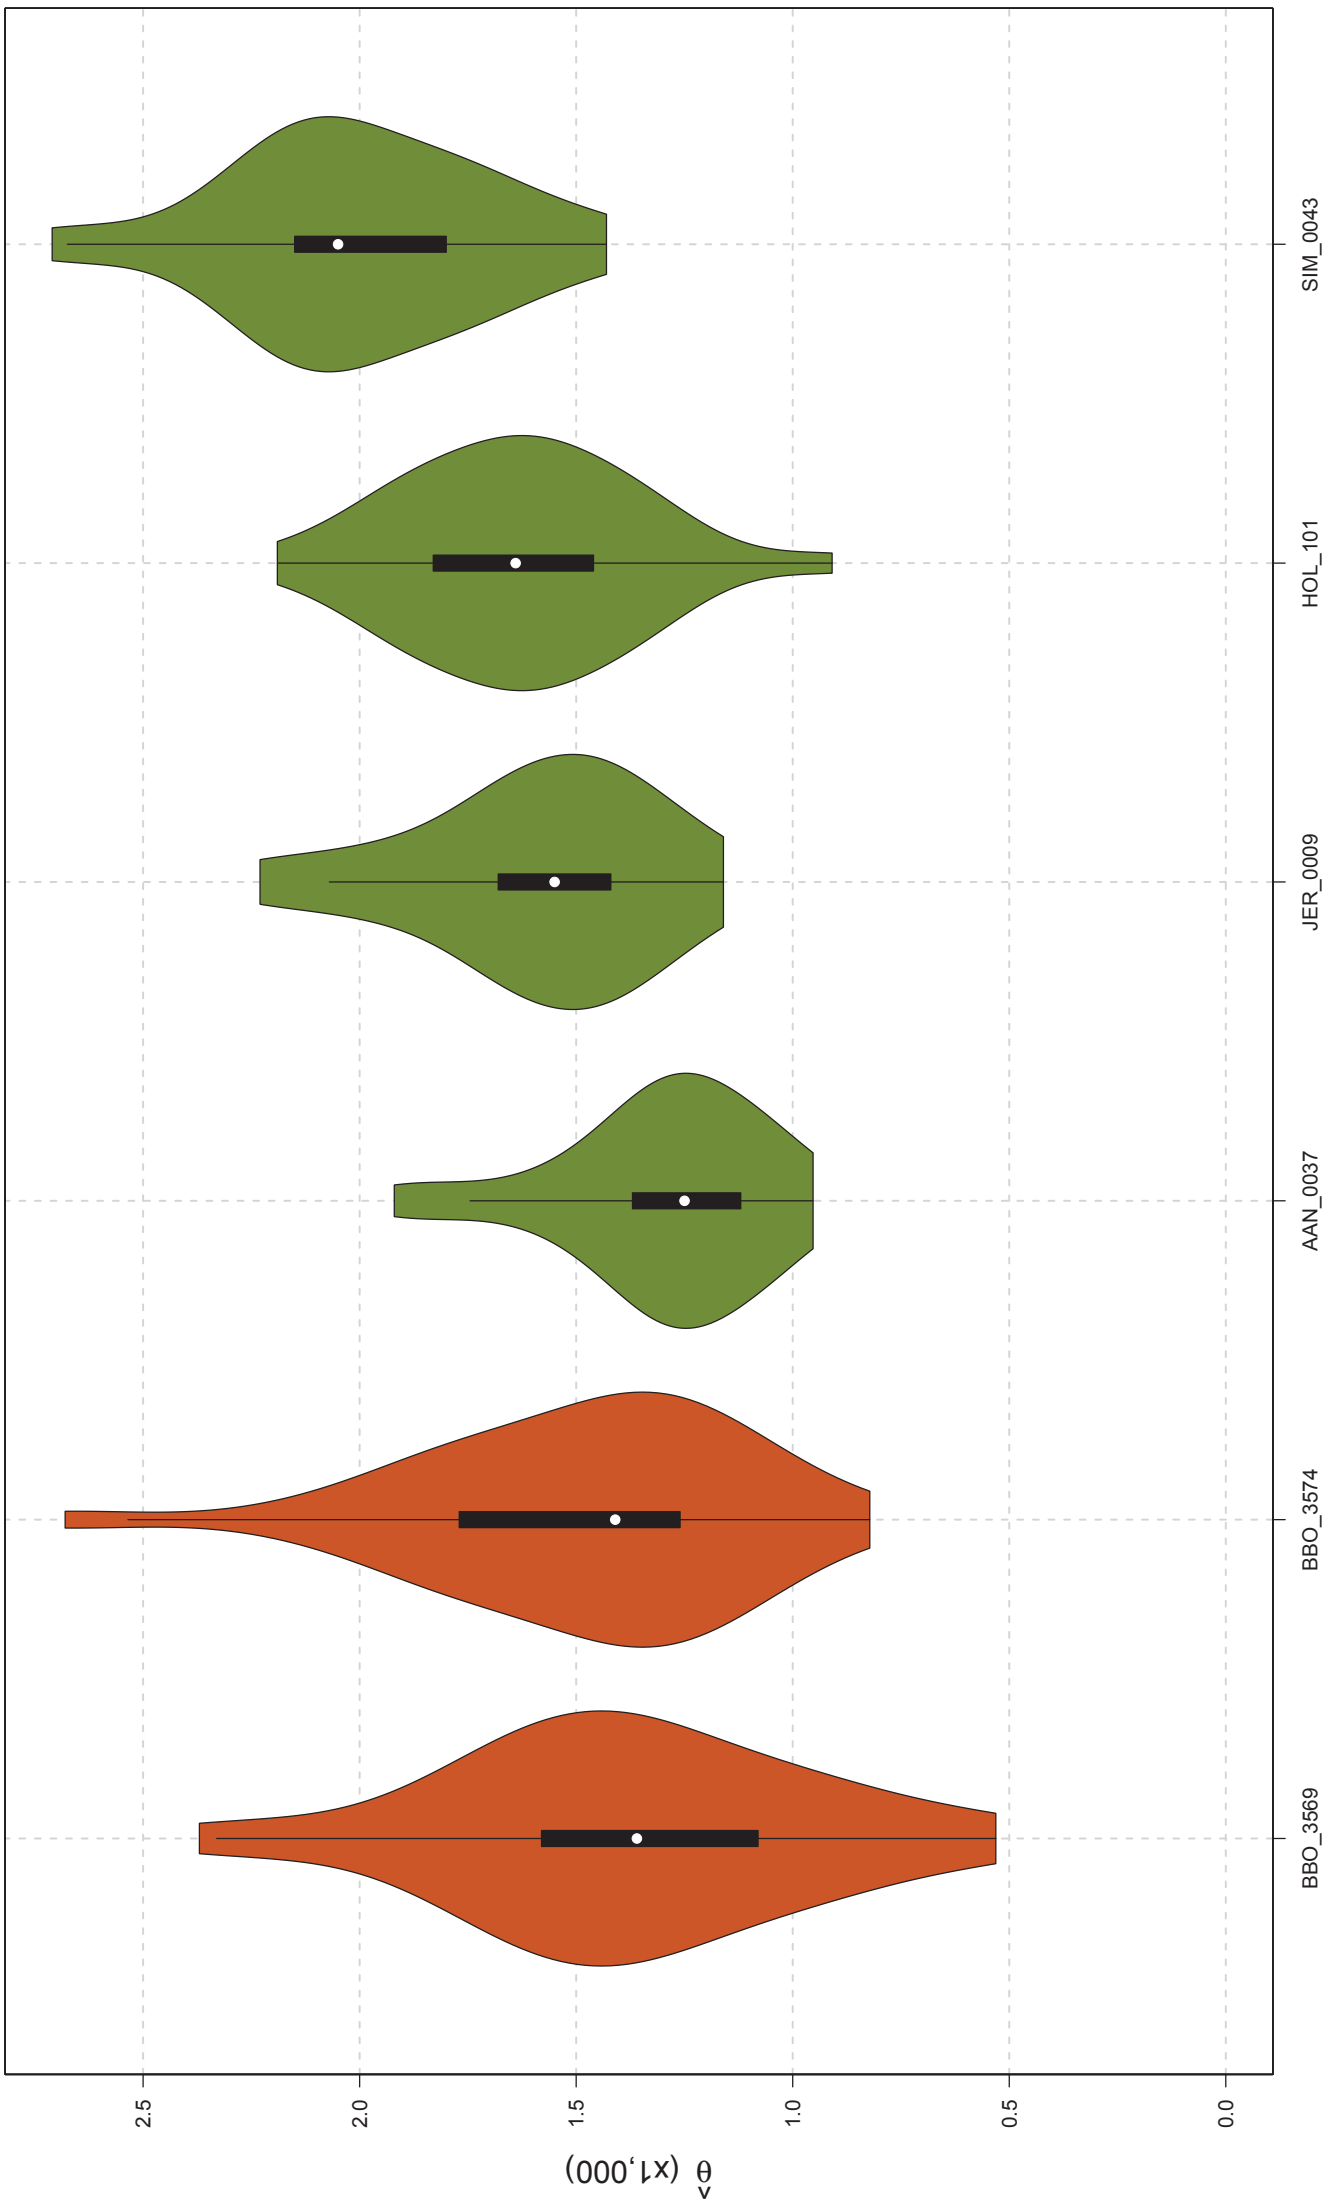

Population Size History in scaled units

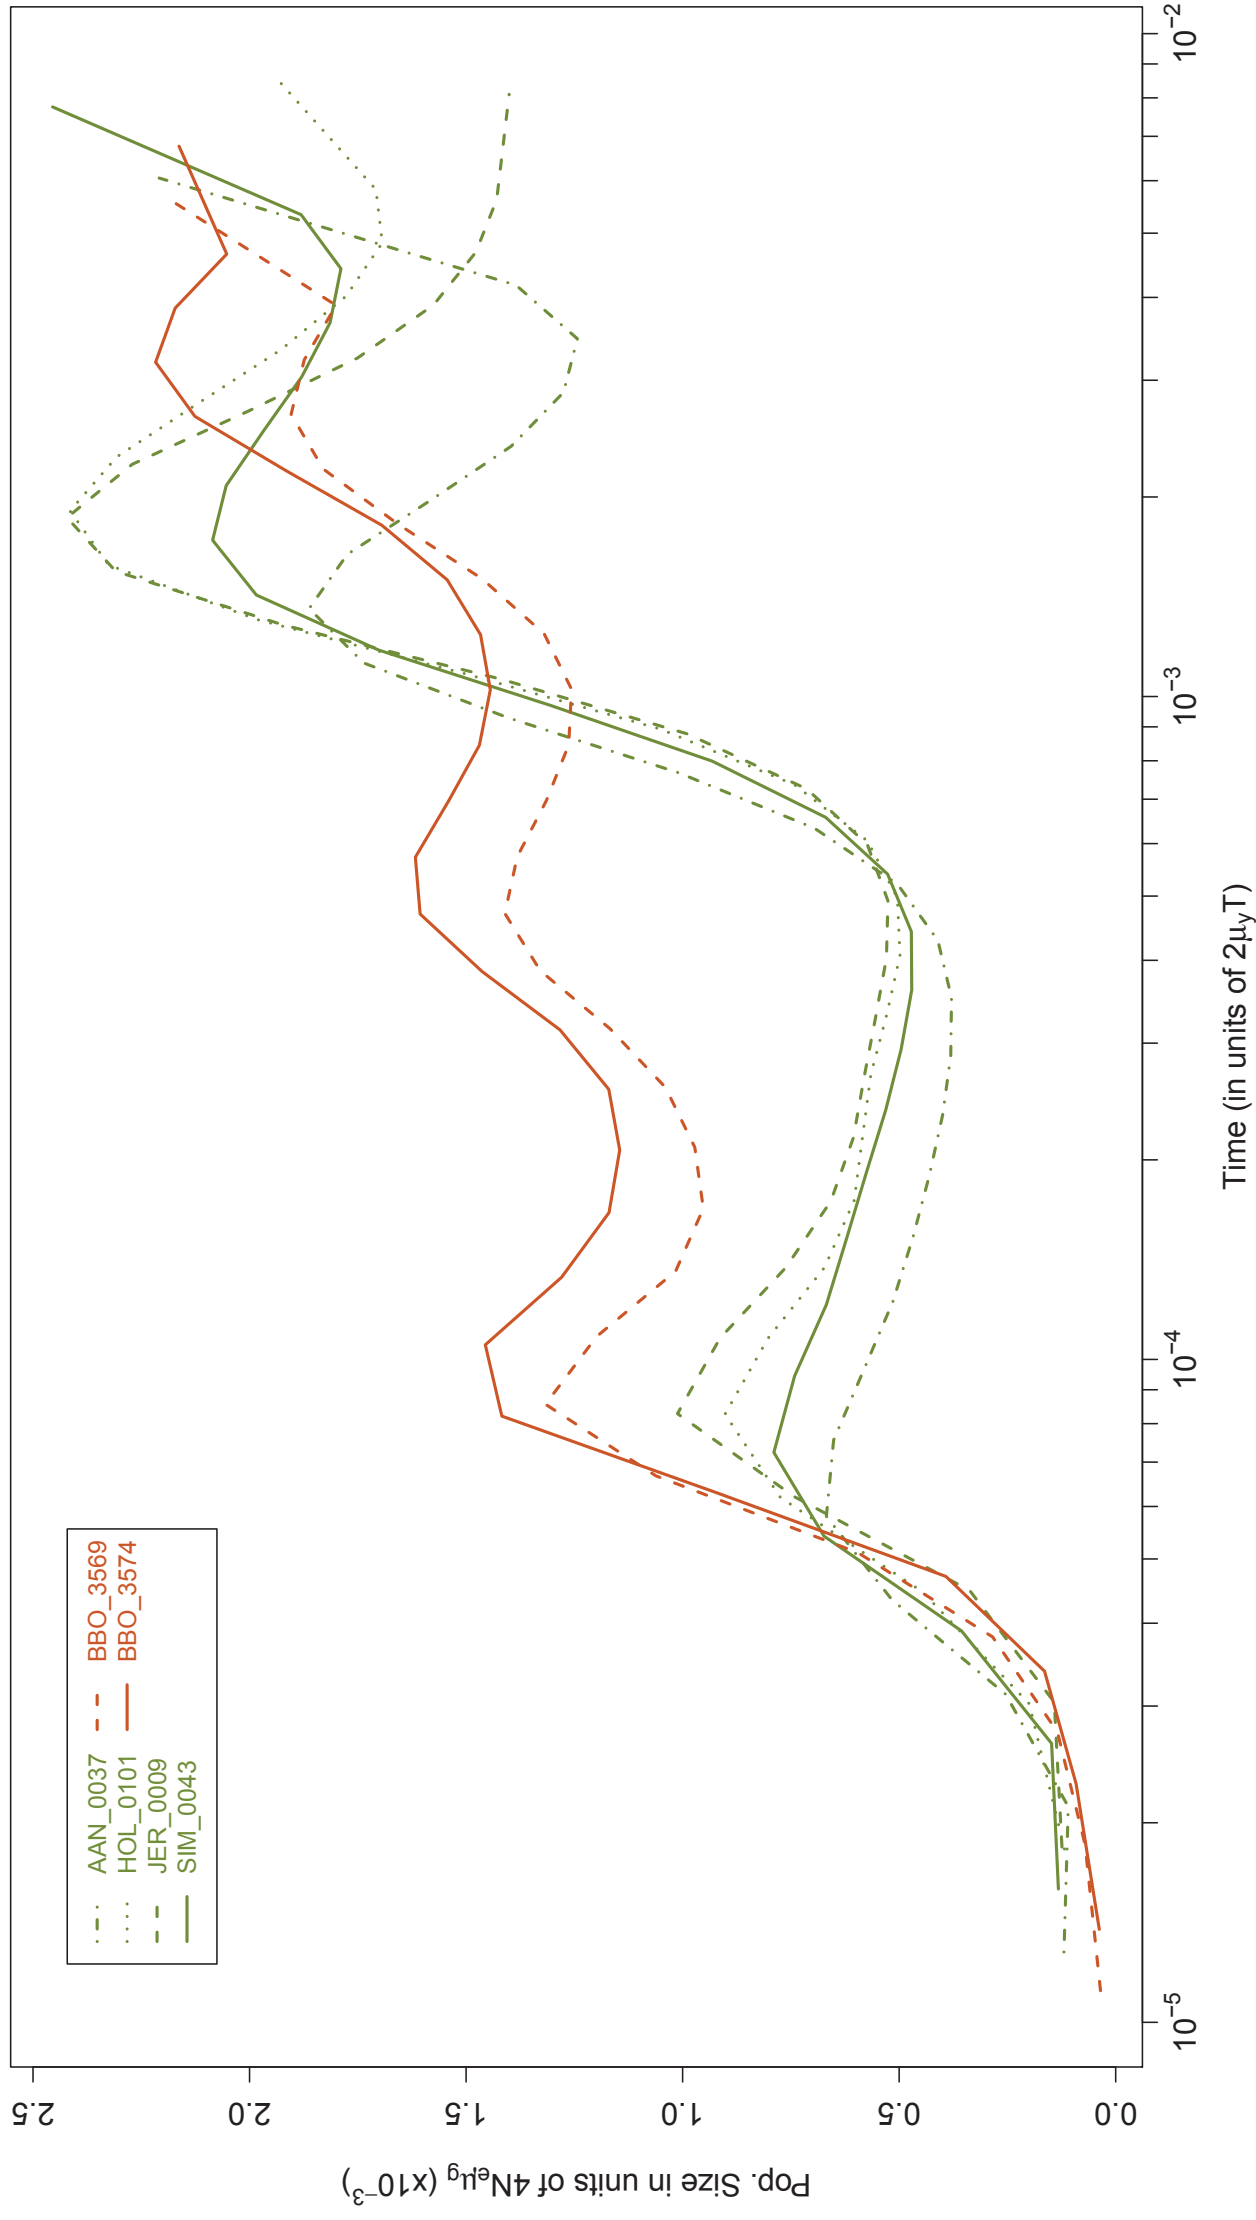

**A) BBO\_3569**

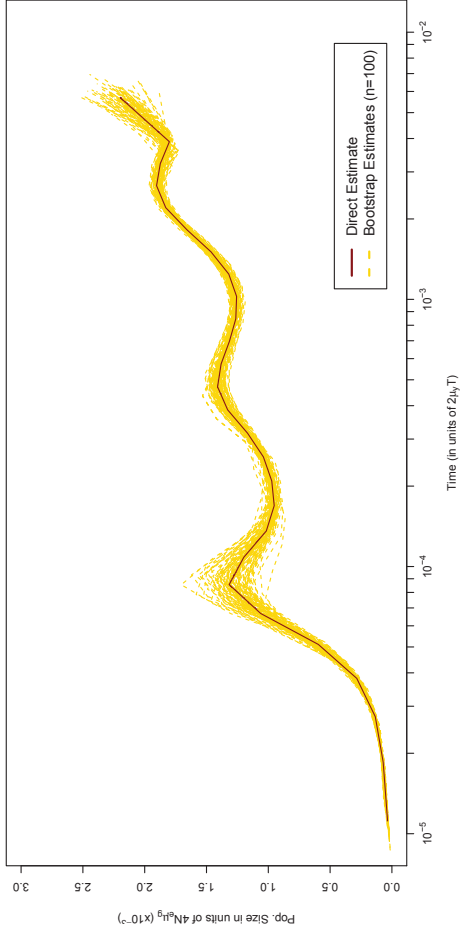

**B) BBO\_3574**

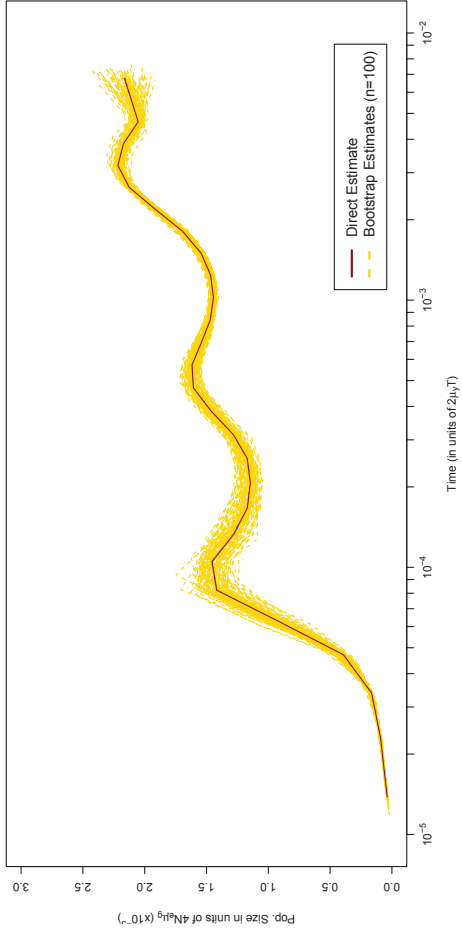

**C) AAN\_0037**

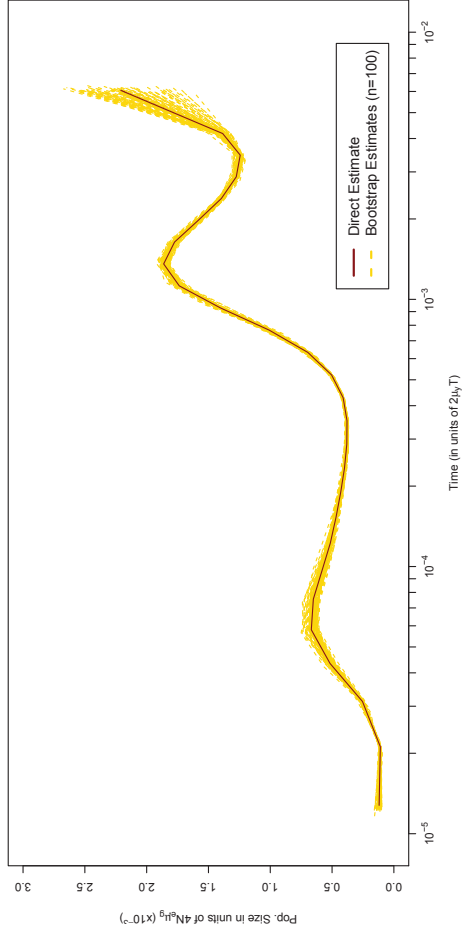

**D) HOL\_0101**

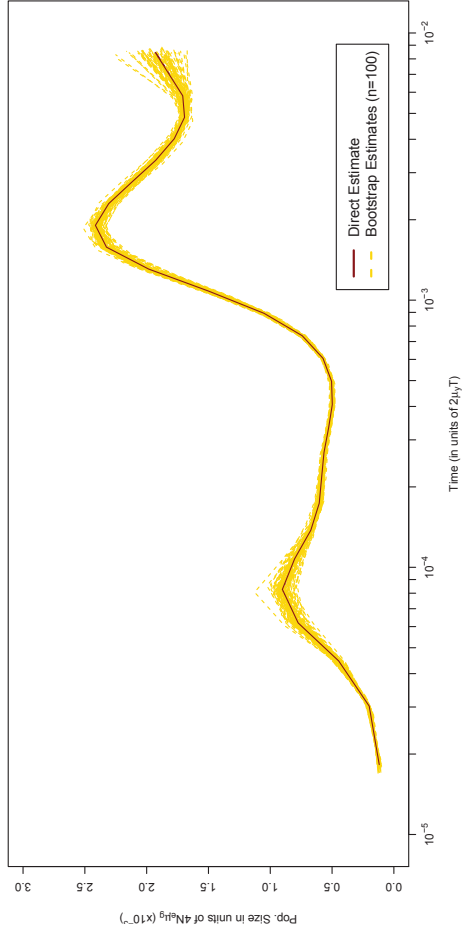

**E) JER\_0009**

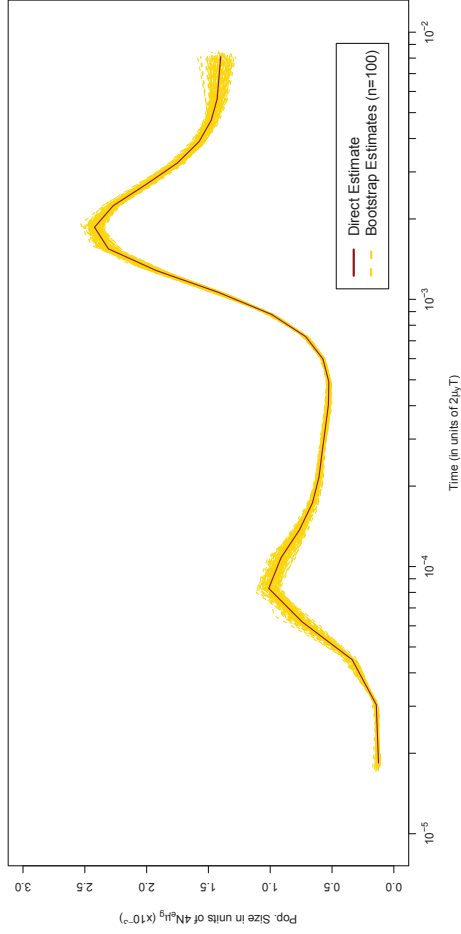

**F) SIM\_0043**

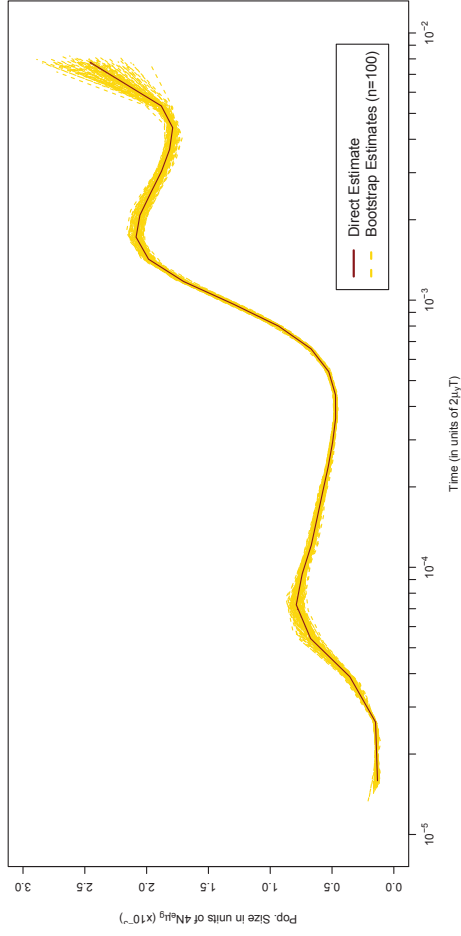

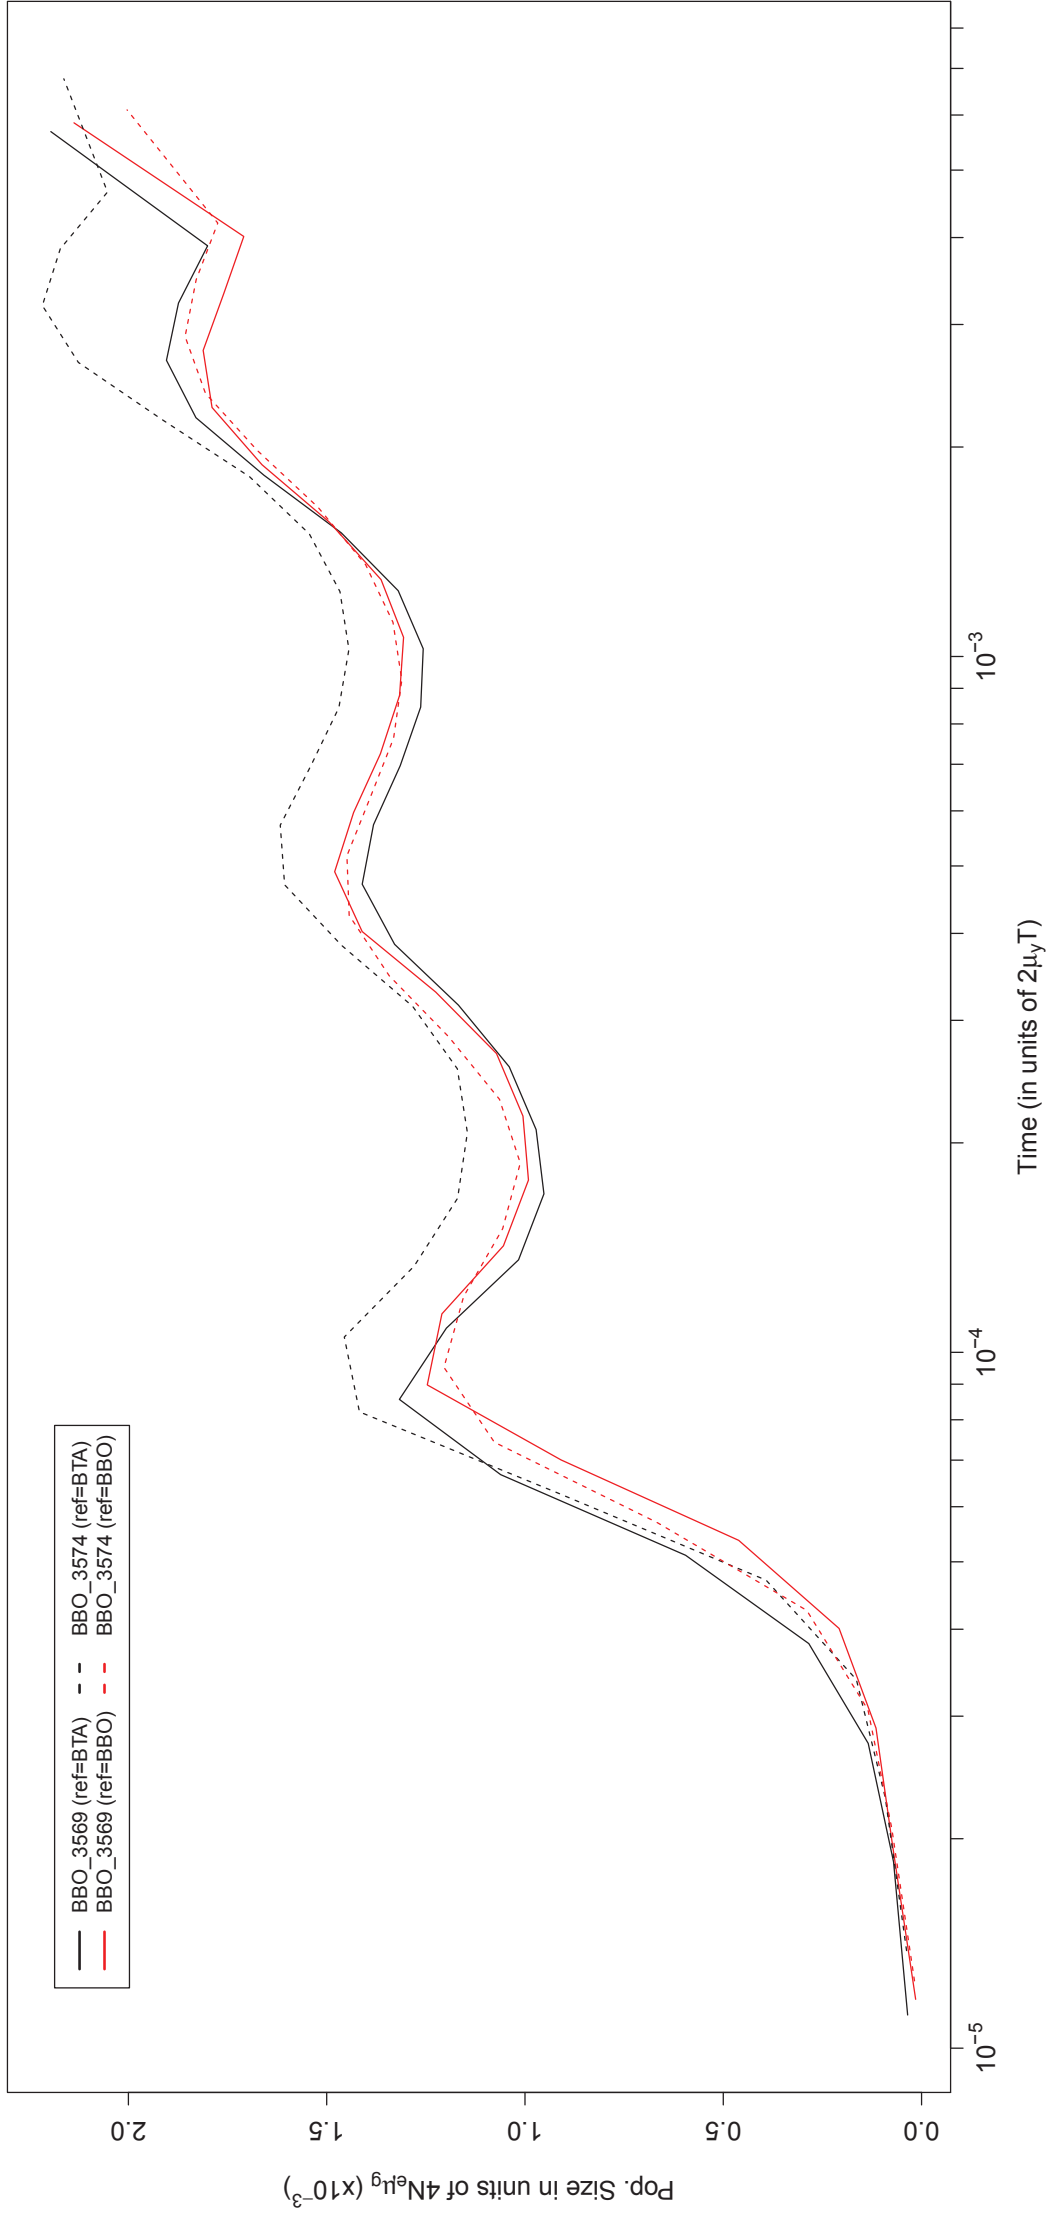

Distribution of Ka/Ks for BBO/BTA protein sequence alignments

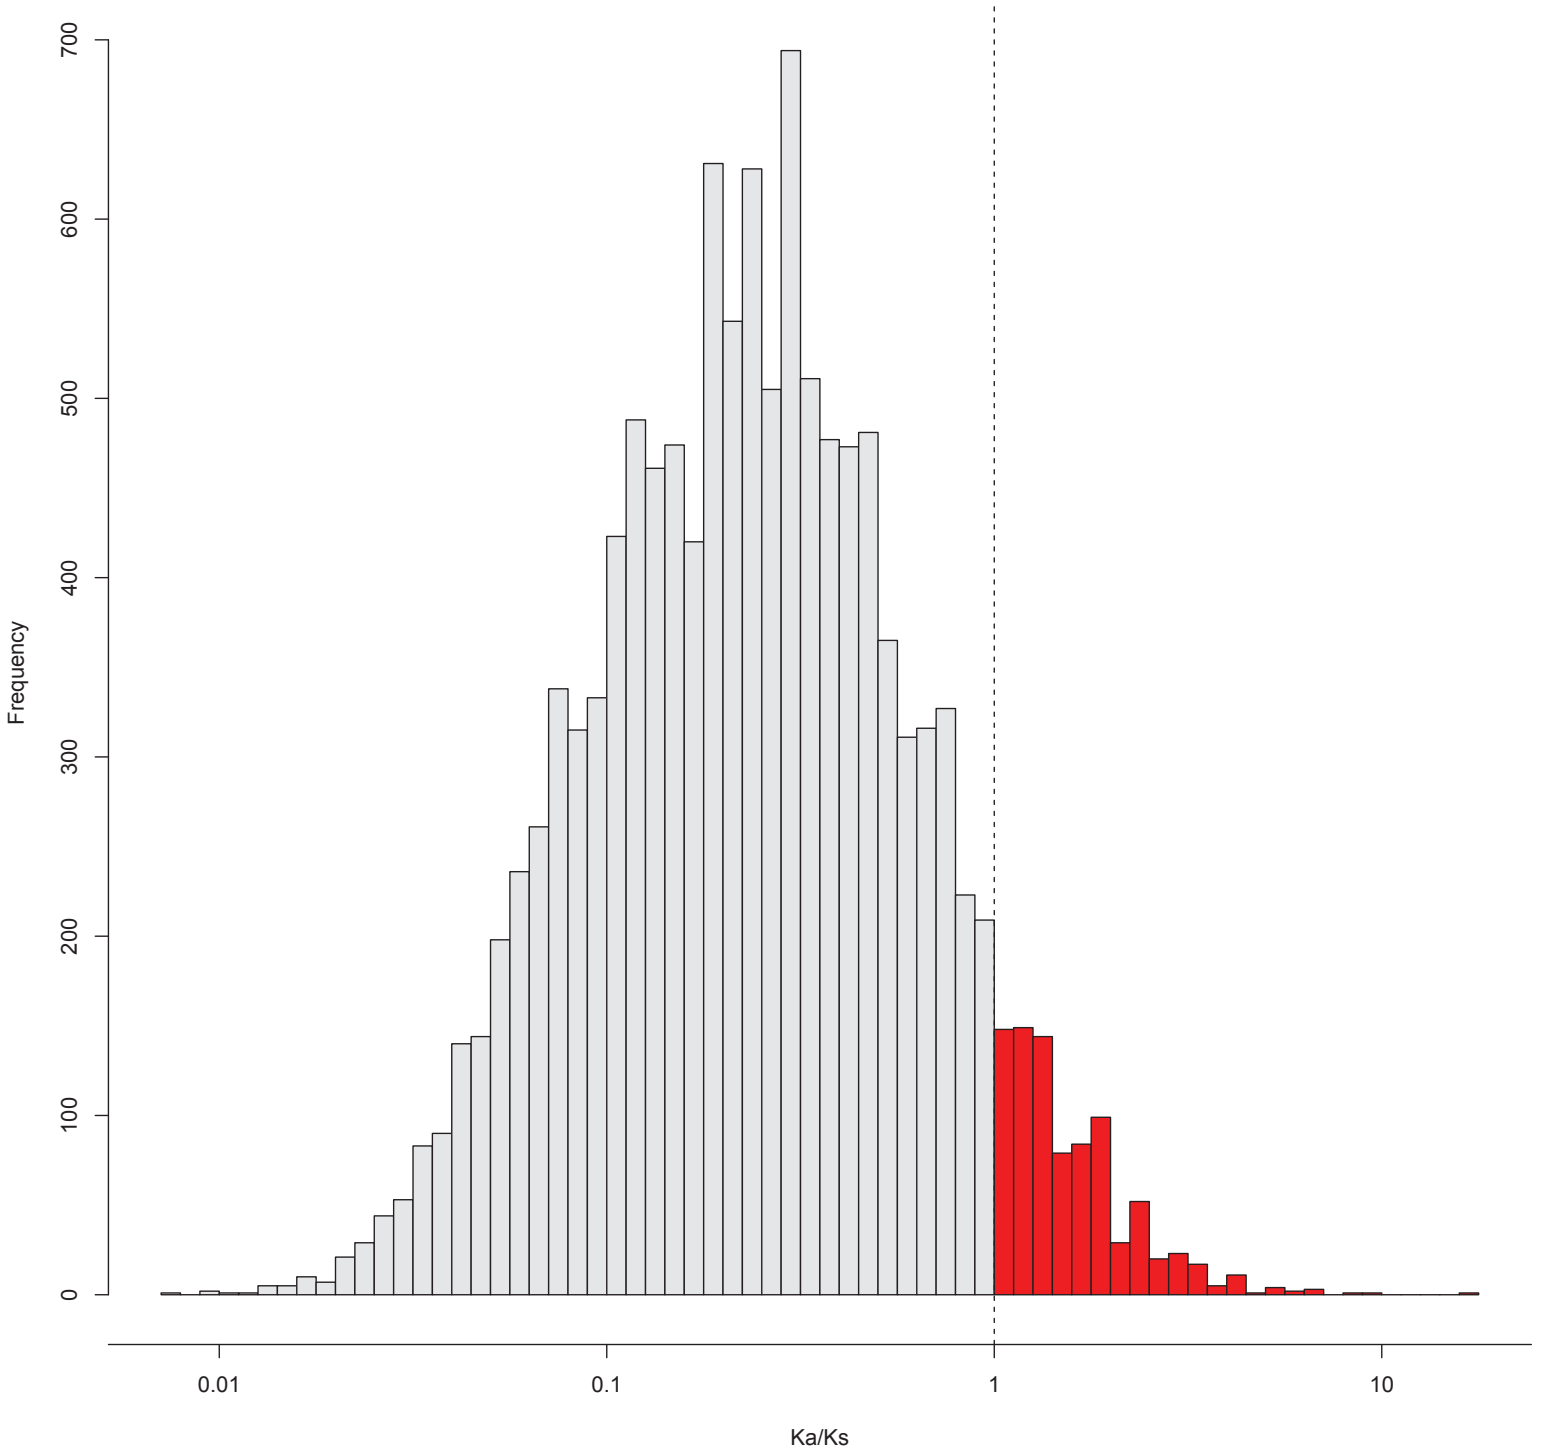

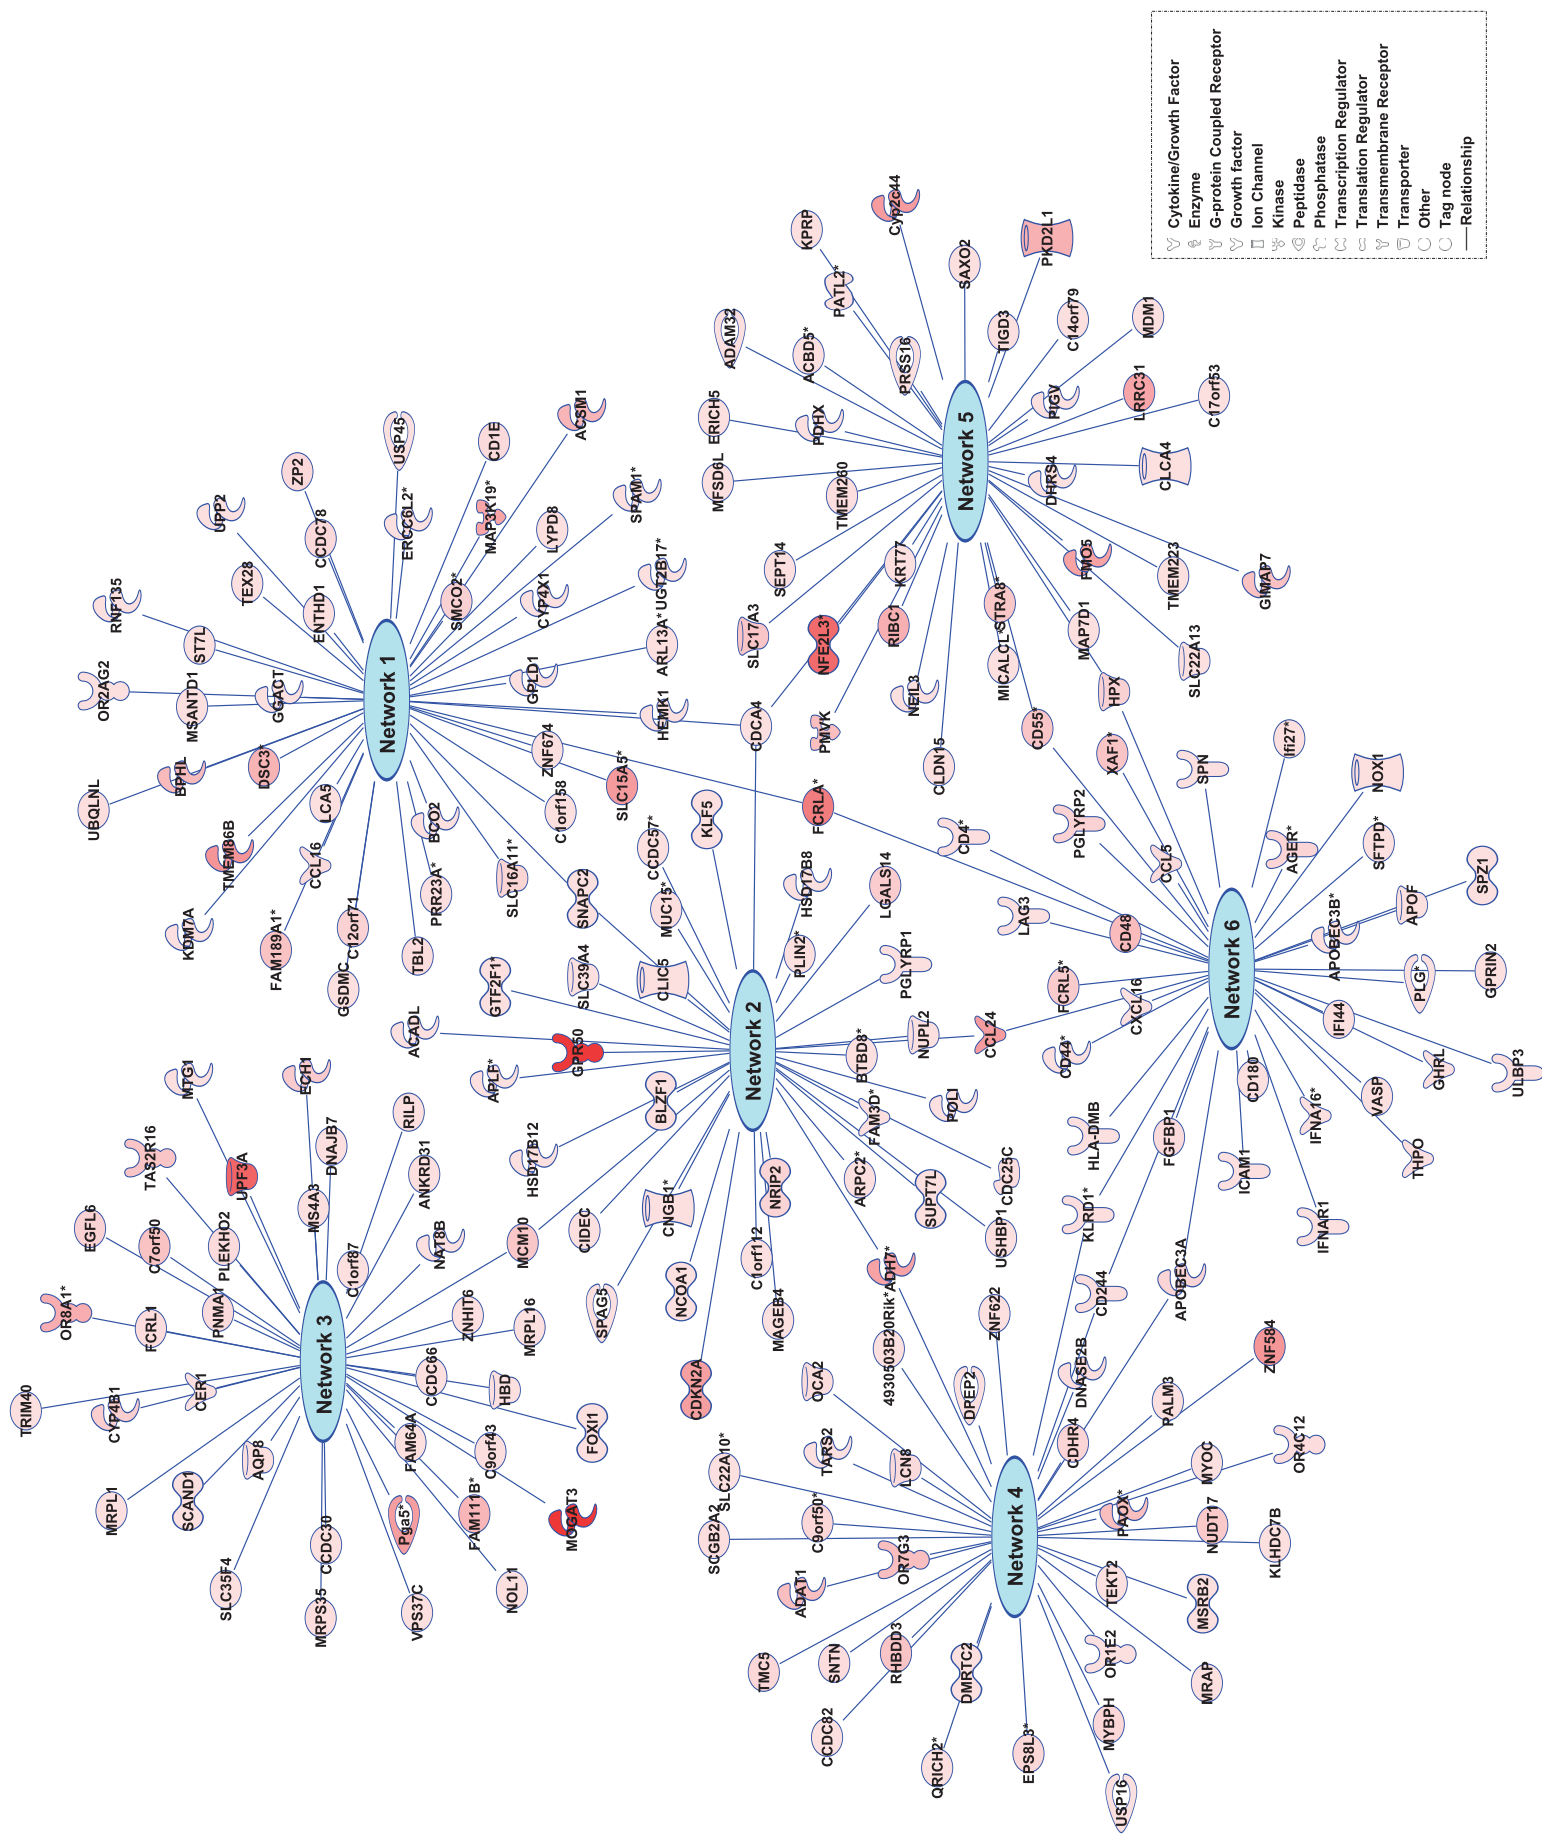

- Cytokine/Growth Factor
- Enzyme
- G-protein Coupled Receptor
- Growth factor
- Ion Channel
- Kinase
- Peptidase
- Phosphatase
- Transcription Regulator
- Translation Regulator
- Transmembrane Receptor
- Transporter
- Other
- Tag node
- Relationship
